# Supplementary material
Source: MDPI journal article supplement (https://www.mdpi.com/2077-0472/12/8/1086)
Supplement: s1 [file s1]

# Supplementary Material

## 1 Supplementary Tables

Supplementary Table S1. Correlation matrix (Pearson (n)) between mineral nutrients in mustard (**A**), beet (**B**) and basil (**C**) microgreens.

### A

| Variables | K            | Ca           | Mg           | P            | S            | Fe       | Zn           | Mn       |
|-----------|--------------|--------------|--------------|--------------|--------------|----------|--------------|----------|
| K         | <b>1</b>     |              |              |              |              |          |              |          |
| Ca        | <b>0.785</b> | <b>1</b>     |              |              |              |          |              |          |
| Mg        | 0.688        | <b>0.965</b> | <b>1</b>     |              |              |          |              |          |
| P         | <b>0.830</b> | <b>0.989</b> | <b>0.966</b> | <b>1</b>     |              |          |              |          |
| S         | 0.649        | <b>0.947</b> | <b>0.973</b> | <b>0.952</b> | <b>1</b>     |          |              |          |
| Fe        | -0.244       | 0.382        | 0.507        | 0.329        | 0.564        | <b>1</b> |              |          |
| Zn        | <b>0.808</b> | <b>0.864</b> | <b>0.791</b> | <b>0.894</b> | <b>0.869</b> | 0.210    | <b>1</b>     |          |
| Mn        | <b>0.904</b> | <b>0.822</b> | <b>0.757</b> | <b>0.873</b> | <b>0.806</b> | 0.011    | <b>0.962</b> | <b>1</b> |

### B

| Variables | K        | Ca           | Mg           | P            | S            | Fe       | Zn           | Mn       |
|-----------|----------|--------------|--------------|--------------|--------------|----------|--------------|----------|
| K         | <b>1</b> |              |              |              |              |          |              |          |
| Ca        | 0.484    | <b>1</b>     |              |              |              |          |              |          |
| Mg        | 0.422    | <b>0.995</b> | <b>1</b>     |              |              |          |              |          |
| P         | 0.512    | <b>0.998</b> | <b>0.994</b> | <b>1</b>     |              |          |              |          |
| S         | 0.446    | <b>0.999</b> | <b>0.997</b> | <b>0.996</b> | <b>1</b>     |          |              |          |
| Fe        | 0.694    | <b>0.762</b> | <b>0.737</b> | <b>0.779</b> | <b>0.753</b> | <b>1</b> |              |          |
| Zn        | 0.198    | <b>0.946</b> | <b>0.970</b> | <b>0.940</b> | <b>0.957</b> | 0.585    | <b>1</b>     |          |
| Mn        | 0.371    | <b>0.975</b> | <b>0.986</b> | <b>0.974</b> | <b>0.978</b> | 0.624    | <b>0.977</b> | <b>1</b> |

### C

| Variables | K             | Ca           | Mg           | P            | S        | Fe       | Zn            | Mn       |
|-----------|---------------|--------------|--------------|--------------|----------|----------|---------------|----------|
| K         | <b>1</b>      |              |              |              |          |          |               |          |
| Ca        | 0.642         | <b>1</b>     |              |              |          |          |               |          |
| Mg        | <b>-0.729</b> | -0.117       | <b>1</b>     |              |          |          |               |          |
| P         | 0.619         | <b>0.828</b> | -0.089       | <b>1</b>     |          |          |               |          |
| S         | 0.317         | <b>0.807</b> | 0.160        | <b>0.850</b> | <b>1</b> |          |               |          |
| Fe        | 0.456         | 0.252        | 0.029        | 0.244        | -0.082   | <b>1</b> |               |          |
| Zn        | 0.529         | 0.456        | -0.666       | 0.376        | 0.461    | -0.484   | <b>1</b>      |          |
| Mn        | -0.519        | -0.136       | <b>0.884</b> | -0.127       | -0.063   | 0.460    | <b>-0.880</b> | <b>1</b> |

Values in bold are different from 0 with a significance level  $\alpha=0.01$ .

2     Supplementary Figures

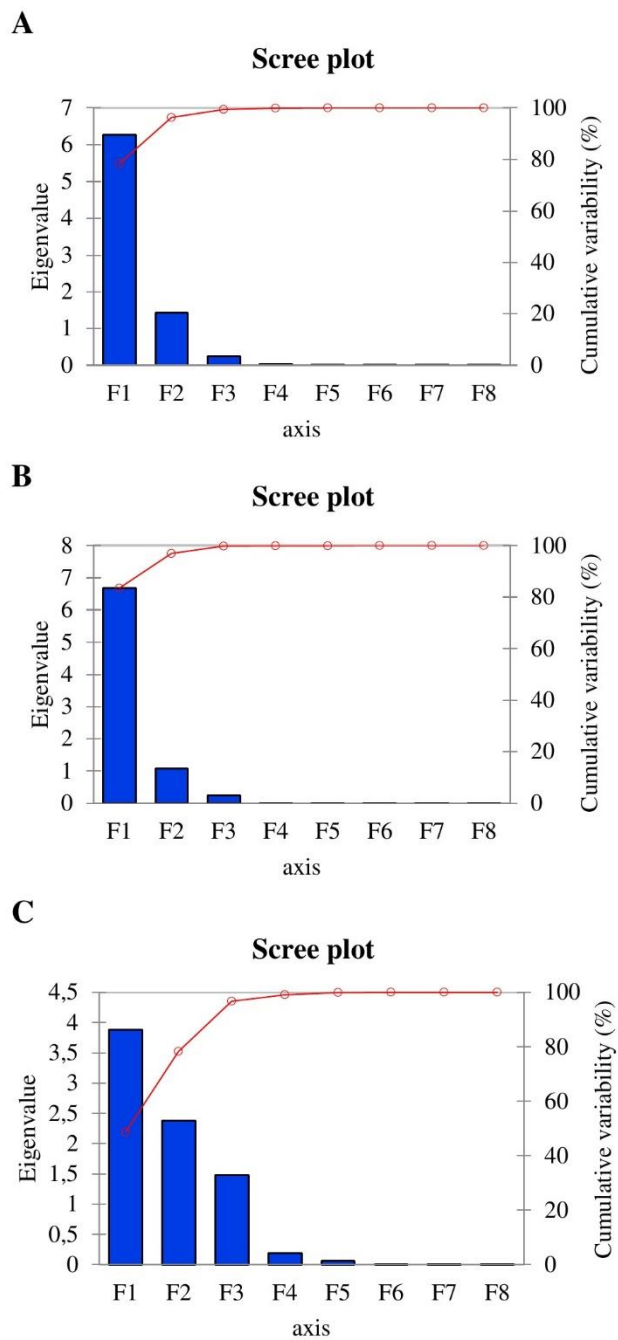

Supplementary Figure S1. Scree plot of mustard (A), beet (B), and basil (C) microgreens under radiation treatments.
